# Supplementary material for: Mitochondrial transcription factor B2 is essential for mitochondrial and cellular function in pancreatic β-cells
Source: PubMed Central journal article supplement — Mol Metab. 2017 May 19;6(7):651–63. doi: 10.1016/j.molmet.2017.05.005 (PMC5485242; doi:10.1016/j.molmet.2017.05.005), 2017-05-19

## Supplementary information

**Supplemental Figure S1: Loss of *Tfb2m* in  $\beta$ -cells results in changes in apoptotic markers, reduced  $\beta$ -cell mass, and reduced islet density.** (a) Western blot and densitometry analysis of cleaved-caspase 3, cleaved-caspase 9, and BAX:BCL-2 protein abundance in islets from control and  $\beta$ -*Tfb2m*<sup>-/-</sup> mice; control, *n*=6 mice and  $\beta$ -*Tfb2m*<sup>-/-</sup>, *n*=5 mice. (b and c) Quantification of  $\beta$ -cell mass and islet density in control and  $\beta$ -*Tfb2m*<sup>-/-</sup> mice at 7 weeks of age, *n*=6 mice. Representative images for quantitative western blots are shown. All data are mean  $\pm$  s.e.m. Statistical differences were examined by unpaired Student's *t*-test. \**P*<0.05 and \*\**P*<0.01 versus the corresponding value for control mice.

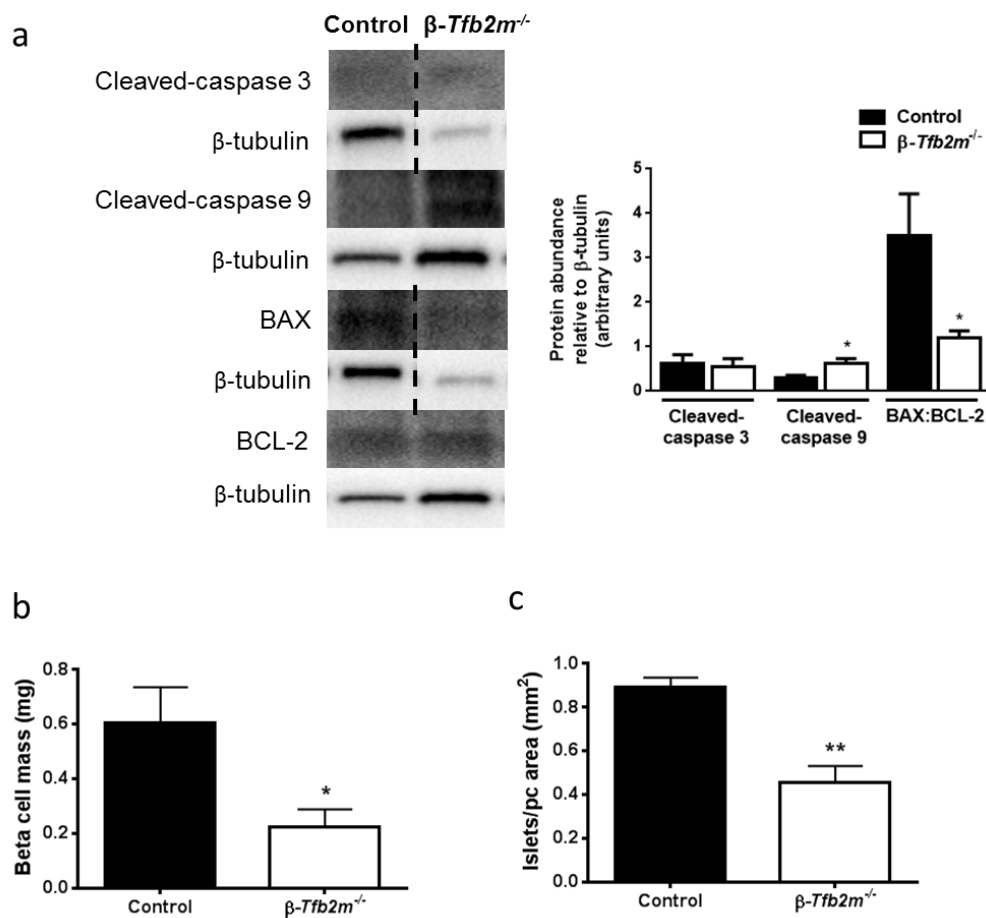

**Supplemental Figure S2: Heterozygous loss of *Tfb2m* in  $\beta$ -cells results in disrupted whole body metabolism as a consequence of impaired mitochondrial function and diminished insulin secretion.** qRT-PCR analysis of (a) *Tfb2m* and *Tfam* mRNA and (b) mitochondrial genes in islets from control and  $\beta$ -*Tfb2m*<sup>+/-</sup> mice; control, *n*=4 mice and  $\beta$ -*Tfb2m*<sup>+/-</sup>, *n*=6 mice. Plasma (c) glucose and (d) insulin concentrations in non-fasted control and  $\beta$ -*Tfb2m*<sup>+/-</sup> mice at seven months of age; control, *n*=4 mice and  $\beta$ -*Tfb2m*<sup>+/-</sup>, *n*=5 mice. (e) Calculation of the area under the curve (AUC) for plasma glucose during an IVGTT in control and  $\beta$ -*Tfb2m*<sup>+/-</sup> mice at six months of age; control, *n*=4 mice and  $\beta$ -*Tfb2m*<sup>+/-</sup>, *n*=5 mice. (f) Calculation of insulin response defined as AUC for plasma insulin from 0 to 5 mins during an IVGTT in control and  $\beta$ -*Tfb2m*<sup>+/-</sup> mice at six months of age; control, *n*=4 mice and  $\beta$ -*Tfb2m*<sup>+/-</sup>, *n*=5 mice. (g) Change in TMRM fluorescence intensity from baseline following stimulation with 16.7 mM glucose of islets from control and  $\beta$ -*Tfb2m*<sup>+/-</sup> mice at seven months of age, *n*=4 mice. (h and i) Islet ATP content at 1.8 mM glucose and upon stimulation with 22 mM glucose in control and  $\beta$ -*Tfb2m*<sup>+/-</sup> mice at seven months of age; control, *n*=6 mice and  $\beta$ -*Tfb2m*<sup>+/-</sup>, *n*=10 mice (j) Insulin secretion from islets in control and  $\beta$ -*Tfb2m*<sup>+/-</sup> mice at seven months of age. Islets were incubated for 1 h in 2.8 mM and 16.7 mM glucose, 10 mM  $\alpha$ -ketoisocaproic acid ( $\alpha$ -KIC), and 2.8 mM glucose with 35 mM potassium chloride (KCl); control, *n*=4 mice,  $\beta$ -*Tfb2m*<sup>+/-</sup>, *n*=5 mice. (k) Pancreatic insulin content per weight of pancreas in control and  $\beta$ -*Tfb2m*<sup>+/-</sup> mice at seven months of age; control, *n*=3 mice,  $\beta$ -*Tfb2m*<sup>+/-</sup>, *n*=5 mice. All data are mean  $\pm$  s.e.m. Statistical differences were examined by unpaired Student's *t*-test. \**P*<0.05, \*\**P*<0.01 and \*\*\**P*<0.001 versus the corresponding value for control mice.

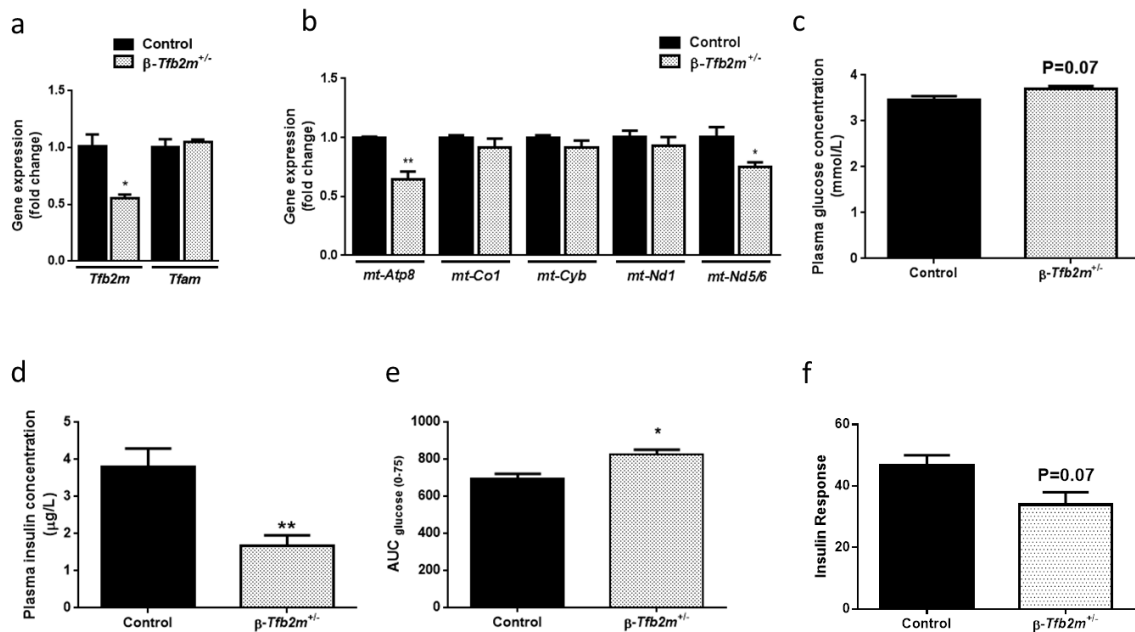

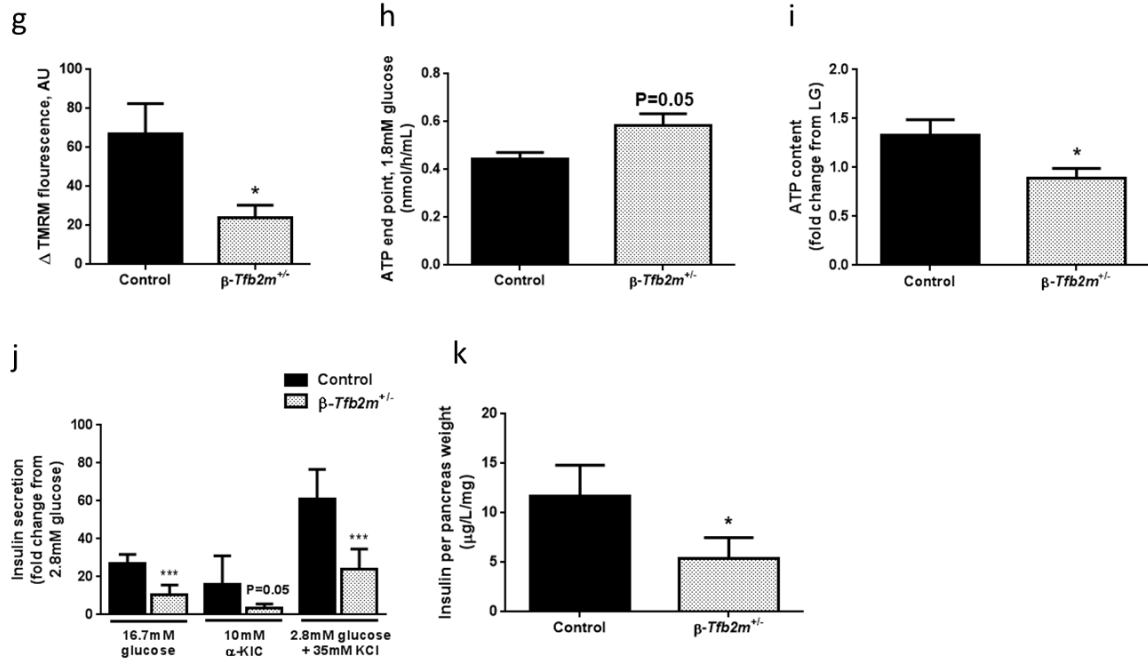

**Supplemental Figure S3: Silencing of *TFB2M* in insulin-producing cells results in decreased expression of mitochondrial encoded genes and consequently impaired insulin secretion.** (a) qRT-PCR analysis of *TFB2M* mRNA (left;  $n=9$  different cell passages/group) and western blot and densitometry analysis of TFB2M protein abundance (right;  $n=3$  different cell passages/group) in control and *TFB2M*-deficient INS-1 832/13 clonal cells. (b) qRT-PCR analysis of *TFAM* mRNA (left;  $n=9$  different cell passages/group) and western blot and densitometry analysis of TFAM protein abundance (right;  $n=5$  different cell passages/group) in control and *TFB2M*-deficient INS-1 832/13 clonal cells. (c) qRT-PCR analysis of mitochondrial encoded genes in control and *TFB2M*-deficient INS-1 832/13 clonal cells;  $n=9$  different cell passages /group. (d) Western blot and densitometry analysis of NDUFB8, MT-ND1, SDHB, UQCRC2, MT-CO1, and ATP5A protein abundance in control and *TFB2M*-deficient INS-1 832/13 clonal cells;  $n=5$  different cell passages/group. (e and f) Mitochondrial DNA content and citrate synthase activity in control and *TFB2M*-deficient INS-1 832/13 clonal cells;  $n=9$  different cell passages/group. (g) Insulin secretion from control and *TFB2M*-deficient INS-1 832/13 clonal cells that were incubated for 1 h in 2.8 mM and 16.7 mM glucose, 10 mM pyruvate, 10 mM leucine/glutamine and 2.8 mM glucose with 35 mM potassium chloride (KCl);  $n=12$  different cell passages/group. Representative images for quantitative western blots are shown. All data are mean  $\pm$  s.e.m. Statistical differences were examined by unpaired Student's t-test \* $P<0.05$ , \*\* $P<0.01$ , \*\*\* $P<0.001$  and \*\*\*\* $P<0.0001$  versus the corresponding value for controls.

a

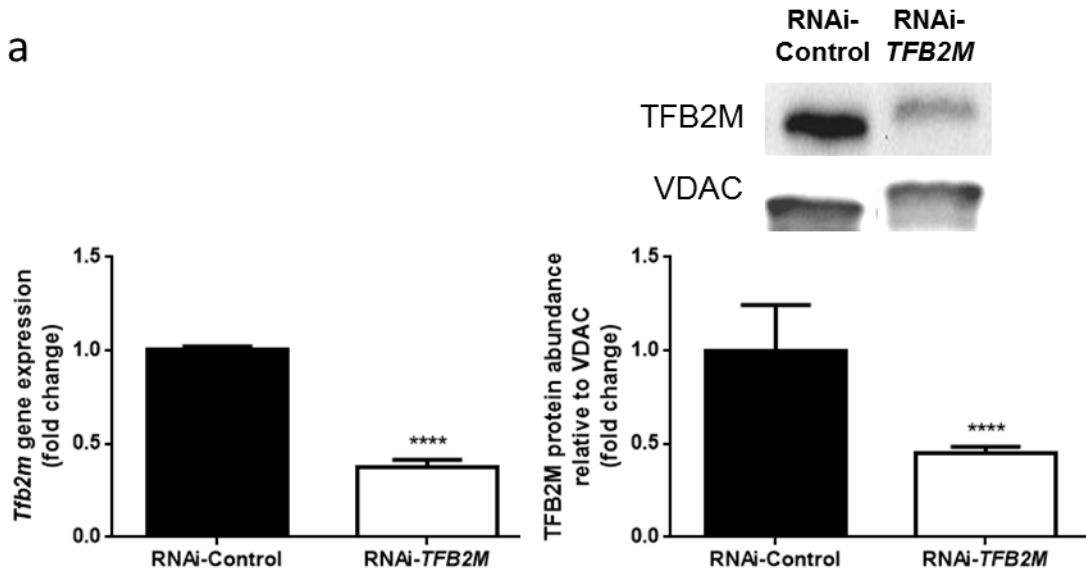

b

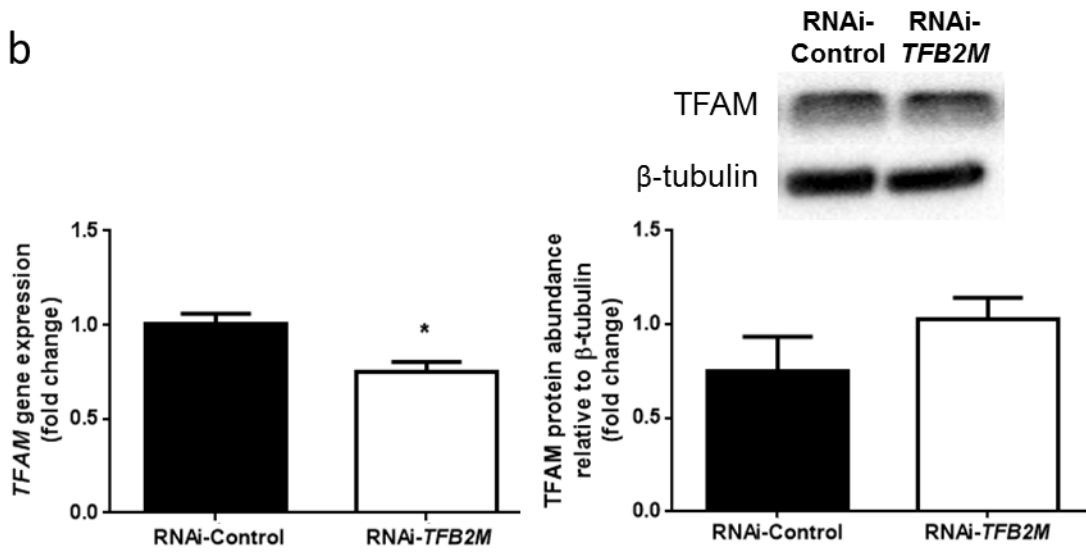

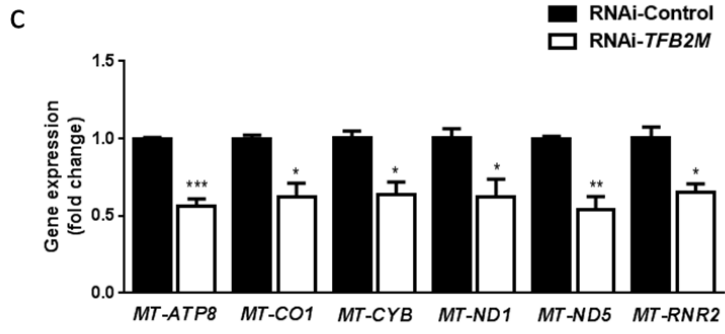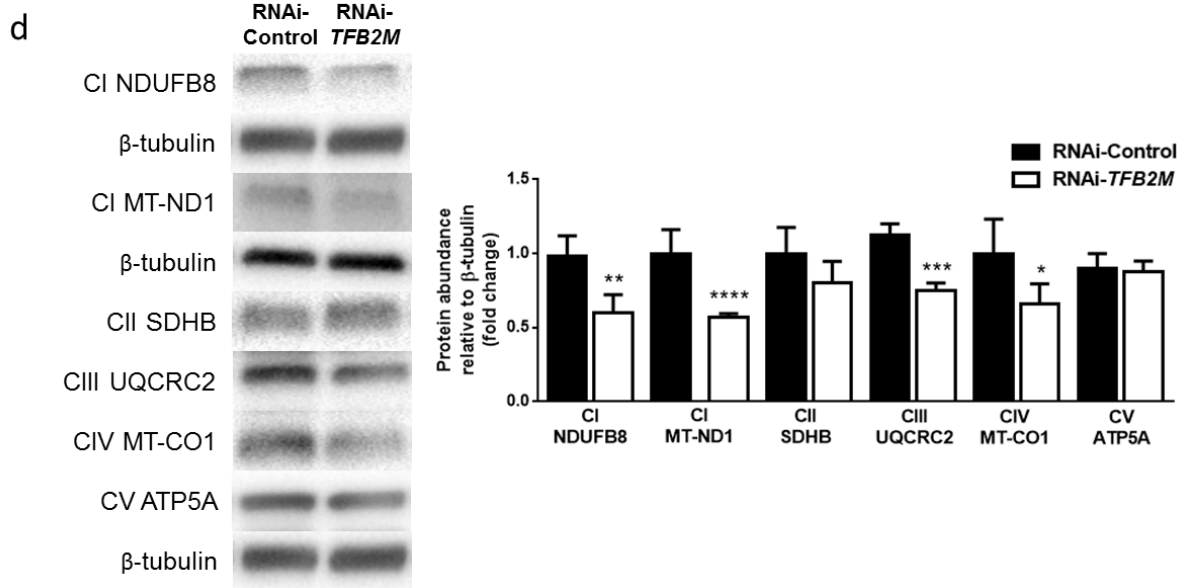

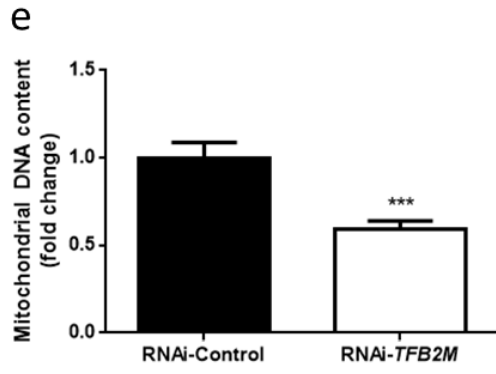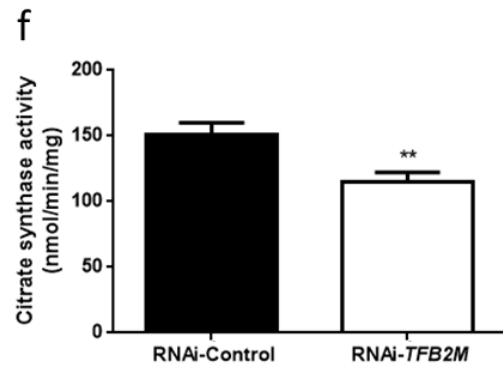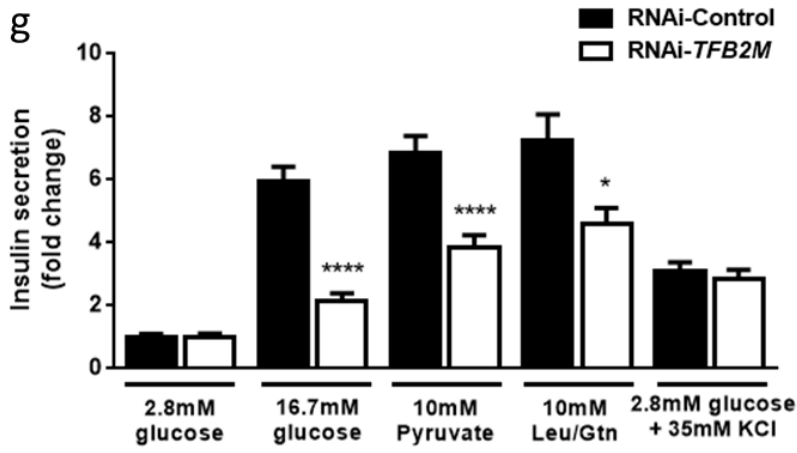

**Supplemental Figure S4: Silencing of *TFB2M* in insulin-producing cells results in impaired autophagy.**

(a) Left - Representative fluorescence microscopy image of control and *TFB2M*-deficient INS-1 832/13 clonal cells expressing LC3-GFP (green). Scale bars, 10  $\mu$ m. Right - Quantification of LC3<sup>+</sup> puncta in control and *TFB2M*-deficient INS-1 832/13 clonal cells; *n*=4 different cell passages/group. (b) qRT-PCR analysis of *BECN1*, *CTSB*, and *LAMP2* mRNA in control and *TFB2M*-deficient INS-1 832/13 clonal cells; *n*=5 different cell passages/group. (c) Left - Representative fluorescence microscopy image of control and *TFB2M*-deficient INS-1 832/13 clonal cells expressing LC3-GFP (green) after treatment with LysoTracker (red). Nucleus stained with DAPI (blue). Scale bars, 10  $\mu$ m. Right - Quantification of LC3<sup>+</sup> puncta co-localized with LysoTracker in control and *TFB2M*-deficient INS-1 832/13 clonal cells; *n*=4 different cell passages/group. (d) qRT-PCR analysis of *DDIT3* and *CEBPB* mRNA in control and *TFB2M*-deficient INS-1 832/13 clonal cells; *n*=5 different cell passages/group. All data are mean  $\pm$  s.e.m. Statistical differences were examined by unpaired Student's t-test. \**P*<0.05, \*\**P*<0.01, \*\*\**P*<0.001 and \*\*\*\**P*<0.0001 versus the corresponding value for controls

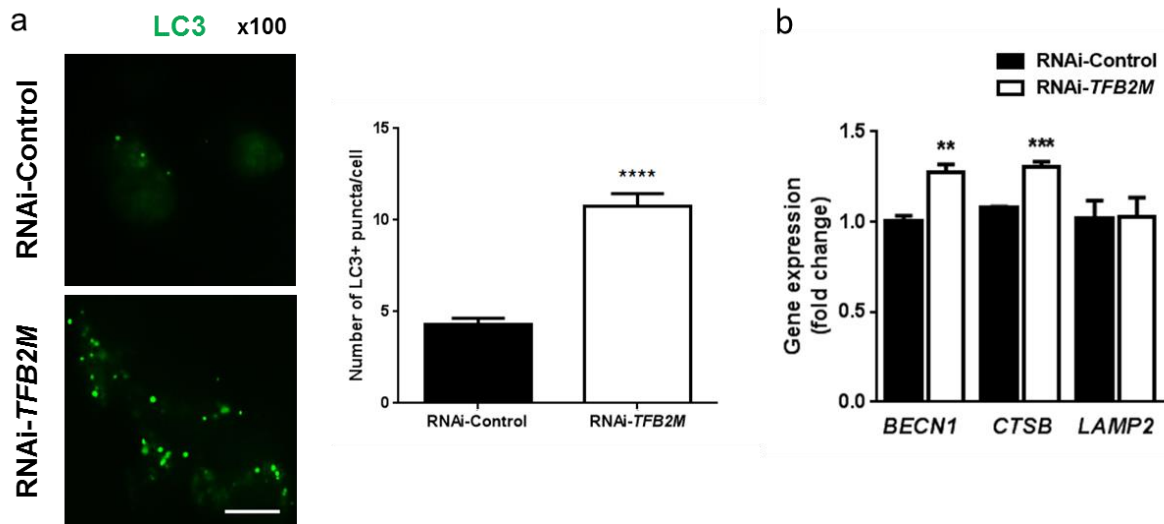



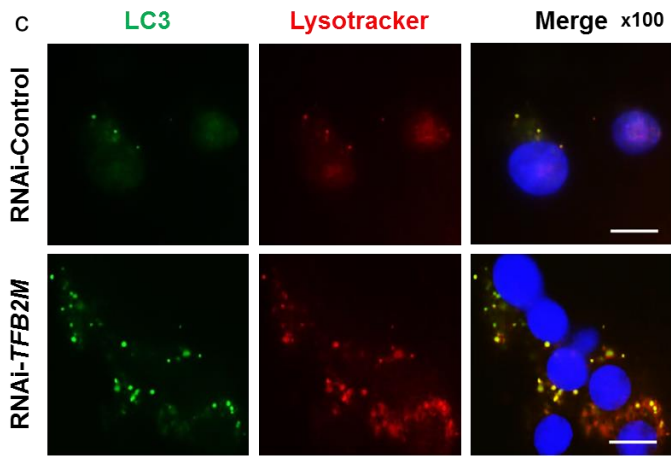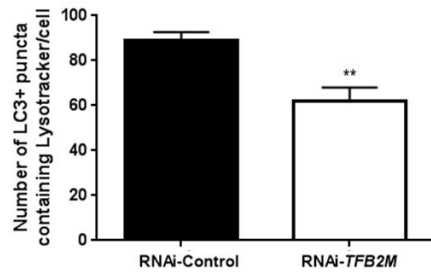

**d**

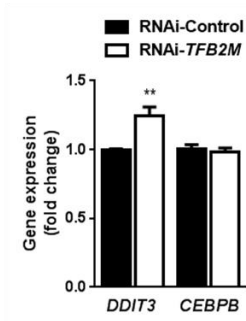

**Supplemental Figure S5: Silencing of *TFB2M* in insulin-producing cells results in disruption of the mitochondrial unfolded protein response and impaired mitophagy** (a) qRT-PCR analysis of *CLPP* and *HSP60* mRNA and western blot and densitometry analysis of CLPP and HSP60 protein abundance in control and *TFB2M*-deficient INS-1 832/13 clonal cells;  $n=5$  different cell passages/group. (b) Left - Representative fluorescence microscopy image of control and *TFB2M*-deficient INS-1 832/13 clonal cells expressing LC3-GFP (green) after treatment with Mitotracker (red). Nucleus stained with DAPI (blue). Scale bars, 10  $\mu$ m. Right - Quantification of LC3<sup>+</sup> puncta co-localized with Mitotracker in control and *TFB2M*-deficient INS-1 832/13 clonal cells;  $n=4$  different cell passages/group. (c) Western blot and densitometry analysis of PINK1 and PARKIN protein abundance in control and *TFB2M*-deficient INS-1 832/13 clonal cells;  $n=5$  different cell passages/group. (d) qRT-PCR analysis of *PDX1*, *INS1*, *INS2*, and *SLC2A2* mRNA in control and *TFB2M*-deficient INS-1 832/13 clonal cells;  $n=5$  different cell passages/group. Representative images for quantitative western blots are shown. All data are mean  $\pm$  s.e.m. Statistical differences were examined by unpaired Student's t-test. \* $P<0.05$ , \*\* $P<0.01$ , \*\*\* $P<0.001$  and \*\*\*\* $P<0.0001$  versus the corresponding value for controls

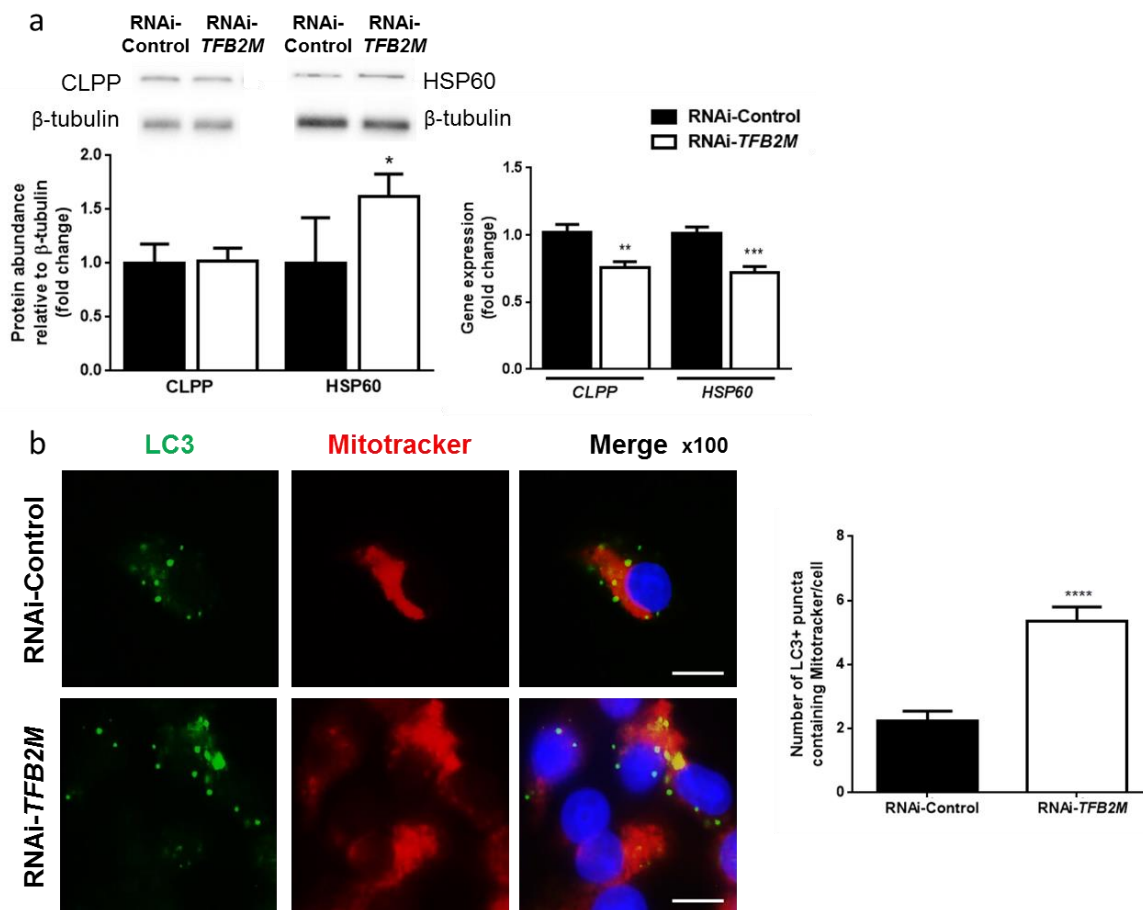

C

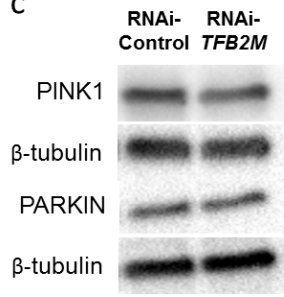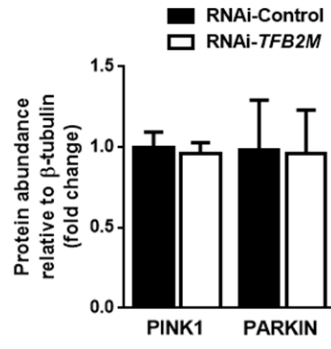

d

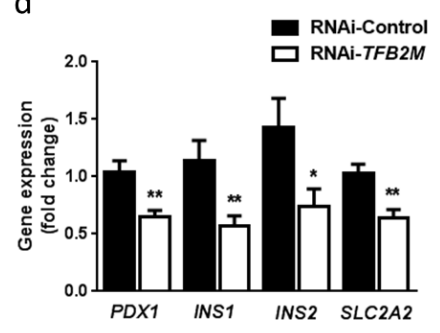

Supplement: mmc1.pdf [file mmc1.pdf]
